# Supplementary material
Source: PubMed Central journal article supplement (PMC5705319)
Supplement: NIHMS901469-supplement-supplemental_IHC_data.pdf [file NIHMS901469-supplement-supplemental_IHC_data.pdf]

|                              | CD68                                        |                                            |                                    | CD14                                        |                                            |                                    | CD206                                       |                                            |                                     | IHC Total<br>CD68<br>Macrophag<br>es<br>(g/tissue) | IHC<br>CD14<br>M1<br>(g/tissue<br>) | IHC<br>CD206<br>M2<br>(g/tissue<br>) |
|------------------------------|---------------------------------------------|--------------------------------------------|------------------------------------|---------------------------------------------|--------------------------------------------|------------------------------------|---------------------------------------------|--------------------------------------------|-------------------------------------|----------------------------------------------------|-------------------------------------|--------------------------------------|
| Code to<br>Match<br>FSC.File | Total<br>Macrophag<br>es (per 10<br>fields) | Total<br>adipocyt<br>es (per<br>10 fields) | CD68/10<br>0<br>adipocyt<br>es (%) | Total<br>Macrophag<br>es (per 10<br>fields) | Total<br>adipocyt<br>es (per<br>10 fields) | CD14/10<br>0<br>adipocyt<br>es (%) | Total<br>Macrophag<br>es (per 10<br>fields) | Total<br>adipocyt<br>es (per<br>10 fields) | CD206/1<br>00<br>adipocyte<br>s (%) |                                                    |                                     |                                      |
| A                            | 27                                          | 344                                        | 7.8                                | 8                                           | 351                                        | 2.3                                | 36                                          | 350                                        | 10.3                                | 108890                                             | 32108                               | 143790                               |
| B                            | 39                                          | 333                                        | 11.7                               | 13                                          | 309                                        | 4.2                                | 48                                          | 277                                        | 17.3                                | 121498                                             | 43615                               | 179651                               |
| C                            | 56                                          | 323                                        | 17.3                               | 18                                          | 324                                        | 5.6                                | 47                                          | 348                                        | 13.5                                | 185197                                             | 59948                               | 144518                               |
| D                            | 49                                          | 269                                        | 18.2                               | 27                                          | 267                                        | 10.1                               | 60                                          | 274                                        | 21.9                                | 118505                                             | 65764                               | 142597                               |
| E                            | 48                                          | 373                                        | 12.9                               | 49                                          | 367                                        | 13.4                               | 80                                          | 414                                        | 19.3                                | 68166                                              | 70808                               | 101984                               |
| F                            | 75                                          | 374                                        | 20.1                               | 52                                          | 369                                        | 14.1                               | 101                                         | 393                                        | 25.7                                | 177960                                             | 124838                              | 227541                               |
| G                            | 66                                          | 319                                        | 20.7                               | 11                                          | 324                                        | 3.4                                | 52                                          | 263                                        | 19.8                                | 148729                                             | 24429                               | 142263                               |
| H                            | 53                                          | 284                                        | 18.7                               | 13                                          | 285                                        | 4.6                                | 40                                          | 265                                        | 15.1                                | 131530                                             | 32355                               | 106209                               |
| I                            | 28                                          | 338                                        | 8.3                                | 12                                          | 354                                        | 3.4                                | 43                                          | 364                                        | 11.8                                | 134352                                             | 55036                               | 191006                               |
| J                            | 78                                          | 318                                        | 24.5                               | 34                                          | 288                                        | 11.8                               | 57                                          | 322                                        | 17.7                                | 224434                                             | 108095                              | 162142                               |
| K                            | 70                                          | 500                                        | 14.0                               | 30                                          | 504                                        | 6.0                                | 60                                          | 514                                        | 11.7                                | 260906                                             | 111817                              | 218043                               |
| L                            | 109                                         | 419                                        | 26.0                               | 41                                          | 344                                        | 11.9                               | 104                                         | 352                                        | 29.5                                | 262619                                             | 120199                              | 297972                               |
| M                            | 63                                          | 383                                        | 16.4                               | 30                                          | 377                                        | 8.0                                | 85                                          | 362                                        | 23.5                                | 169711                                             | 82786                               | 243183                               |
| N                            | 68                                          | 360                                        | 18.9                               | 37                                          | 355                                        | 10.4                               | 75                                          | 340                                        | 22.1                                | 204415                                             | 112482                              | 239025                               |
| O                            | 56                                          | 378                                        | 14.8                               | 39                                          | 367                                        | 10.6                               | 78                                          | 416                                        | 18.8                                | 161154                                             | 115596                              | 203960                               |
| P                            | 79                                          | 375                                        | 21.1                               | 40                                          | 347                                        | 11.5                               | 69                                          | 366                                        | 18.9                                | 180571                                             | 98415                               | 161743                               |
| Q                            | 28                                          | 495                                        | 5.7                                | 21                                          | 417                                        | 5.0                                | 32                                          | 422                                        | 7.6                                 | 102170                                             | 89623                               | 136226                               |
| R                            | 64                                          | 344                                        | 18.6                               | 24                                          | 331                                        | 7.3                                | 54                                          | 303                                        | 17.8                                | 284427                                             | 111630                              | 272193                               |
| S                            | 49                                          | 295                                        | 16.6                               | 32                                          | 318                                        | 10.1                               | 46                                          | 310                                        | 14.8                                | 132800                                             | 80800                               | 118400                               |
| T                            | 59                                          | 297                                        | 19.9                               | 22                                          | 301                                        | 7.3                                | 75                                          | 318                                        | 23.6                                | 146409                                             | 53708                               | 173630                               |
